# Supplementary material
Source: PubMed Central journal article supplement (PMC2716973)

A

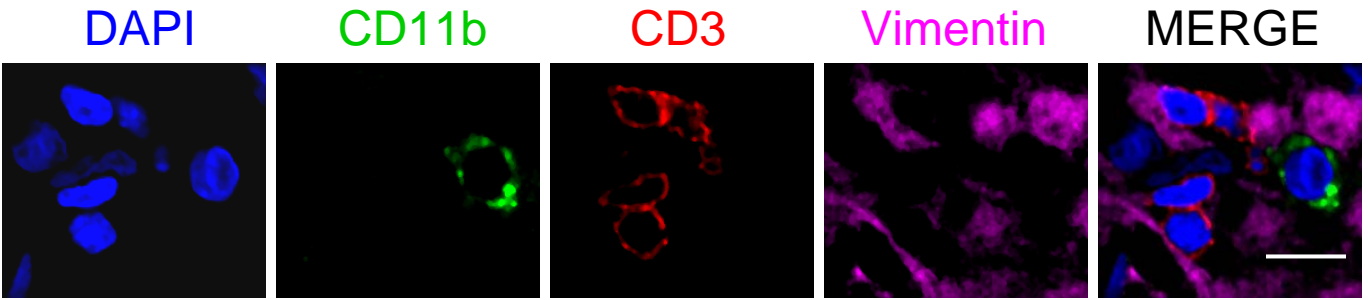

B

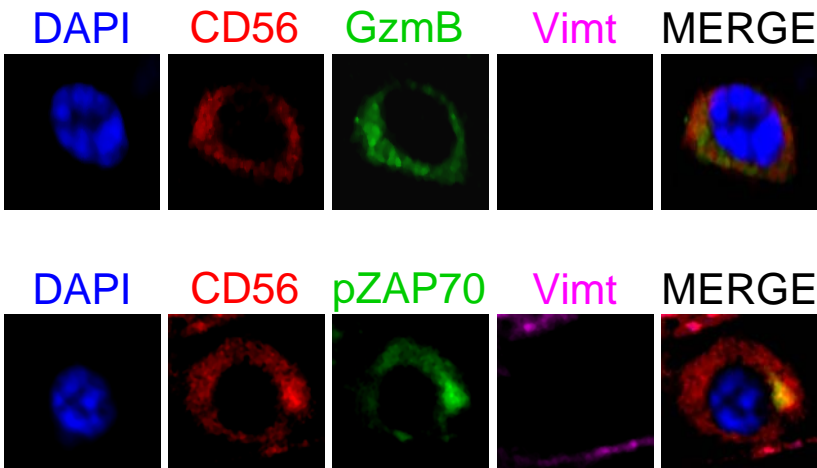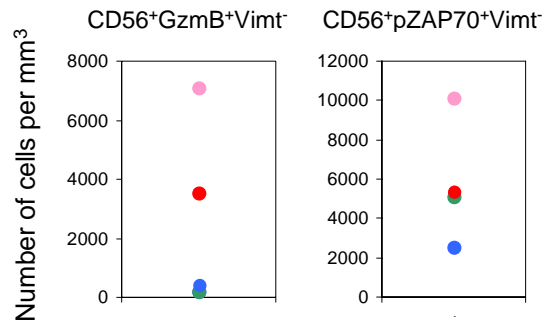

Supplementary Figure 1

Supplement: ajpath.2009.081034_1.pdf [file ajpath.2009.081034_1.pdf]

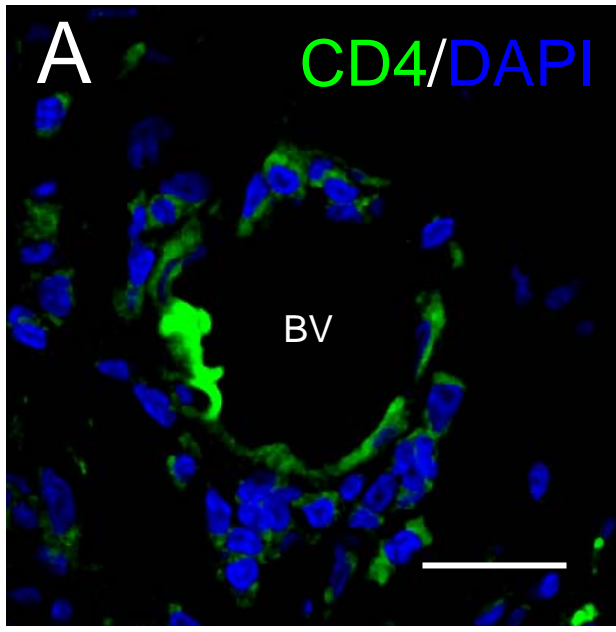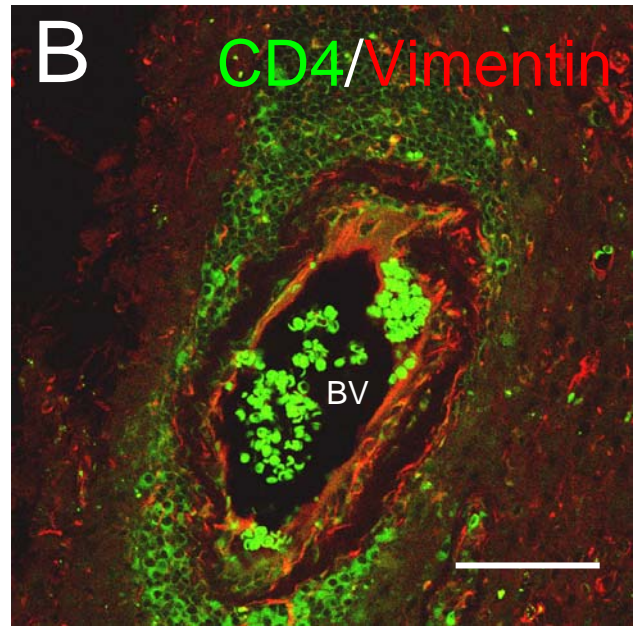

Supplementary Figure 2

Supplement: ajpath.2009.081034_2.pdf [file ajpath.2009.081034_2.pdf]

A

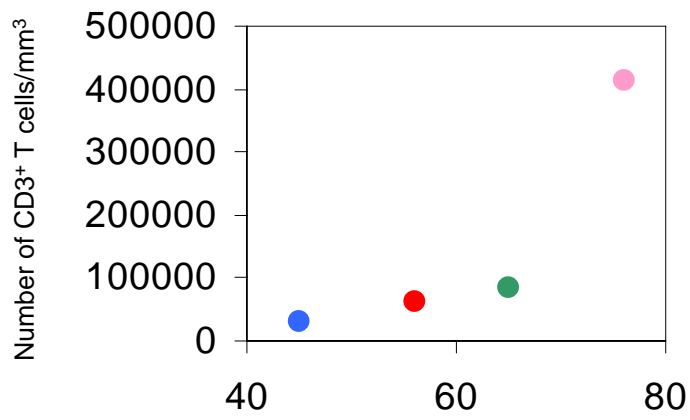

B

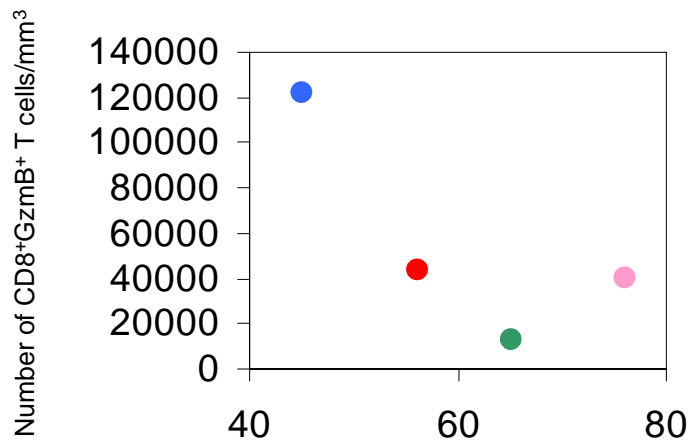

C

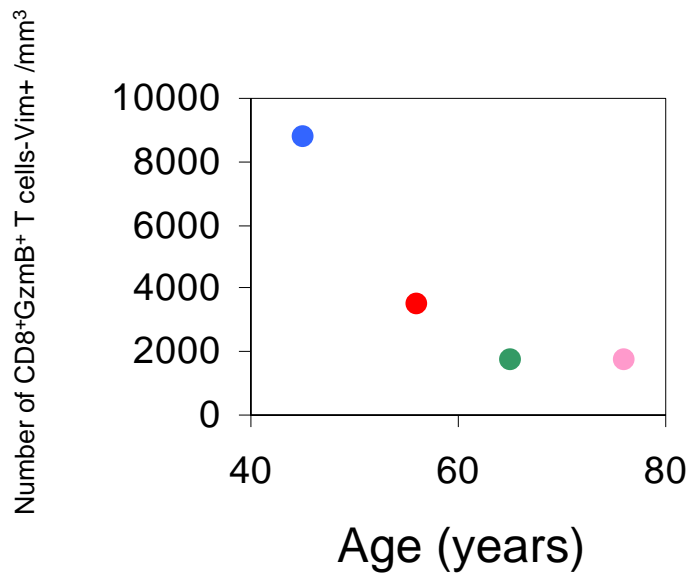

Supplementary Figure 3

Supplement: ajpath.2009.081034_3.pdf [file ajpath.2009.081034_3.pdf]

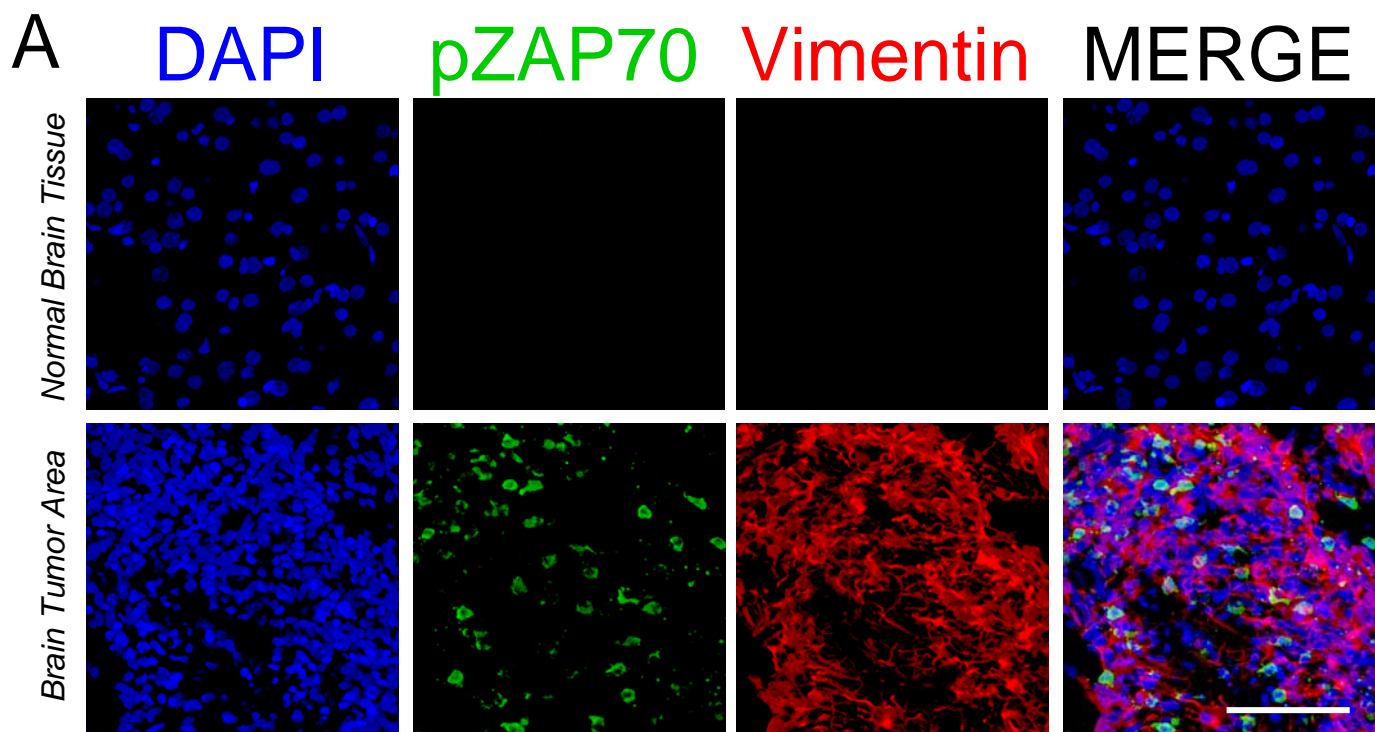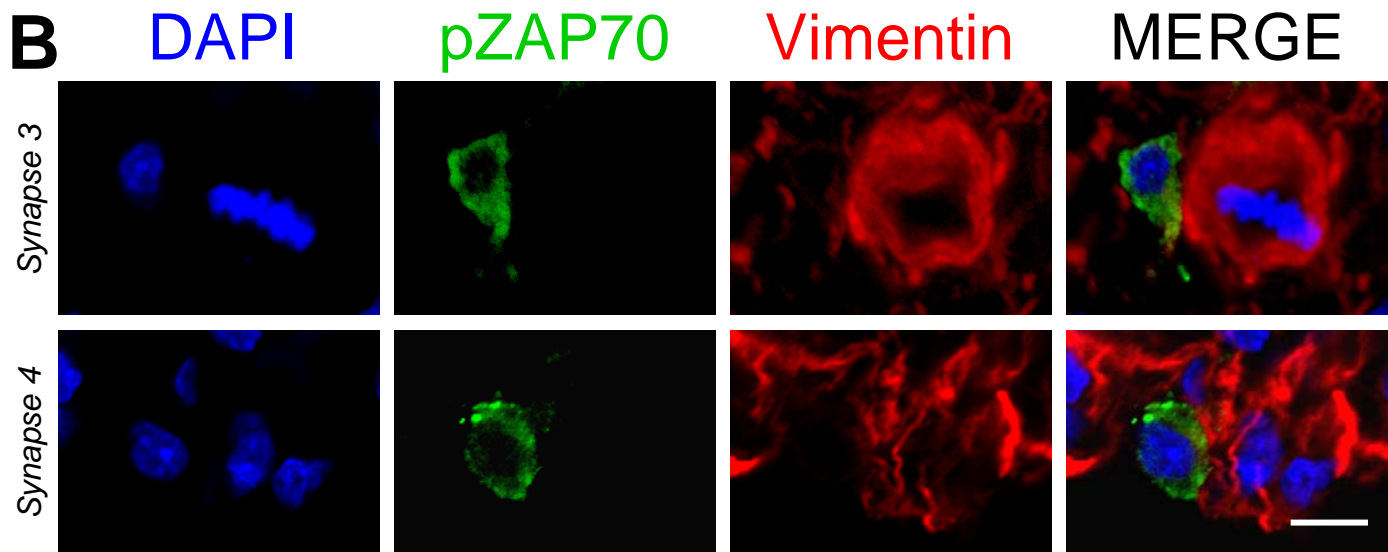

Supplementary Figure 4

Supplement: ajpath.2009.081034_4.pdf [file ajpath.2009.081034_4.pdf]

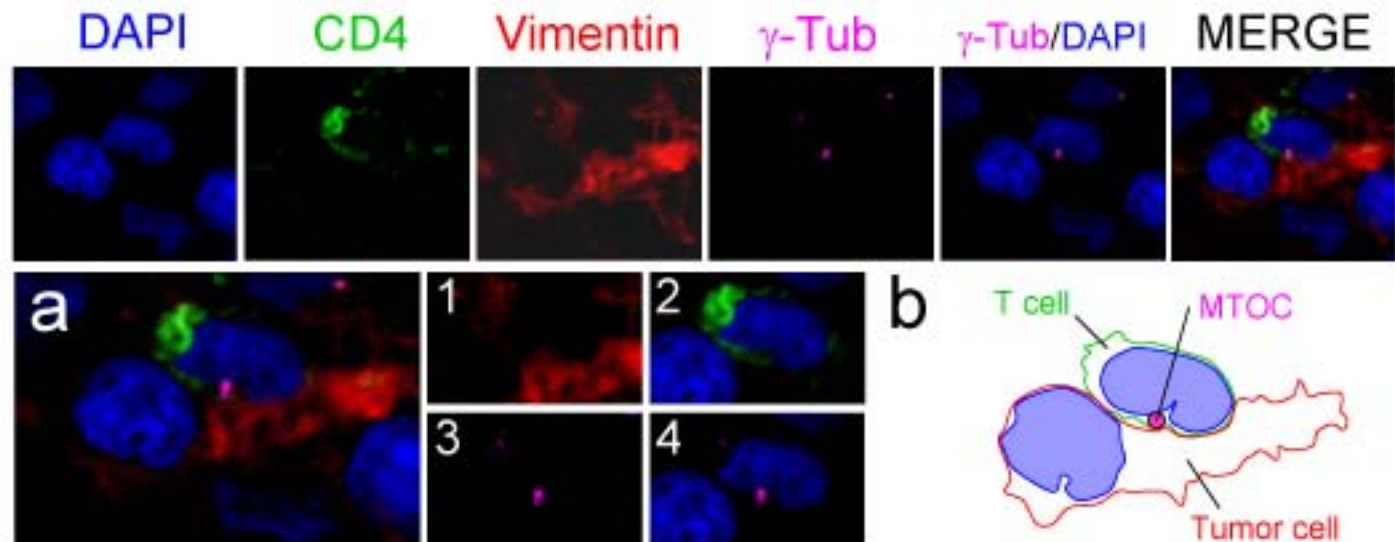

Supplementary Figure 5

Supplement: ajpath.2009.081034_5.pdf [file ajpath.2009.081034_5.pdf]

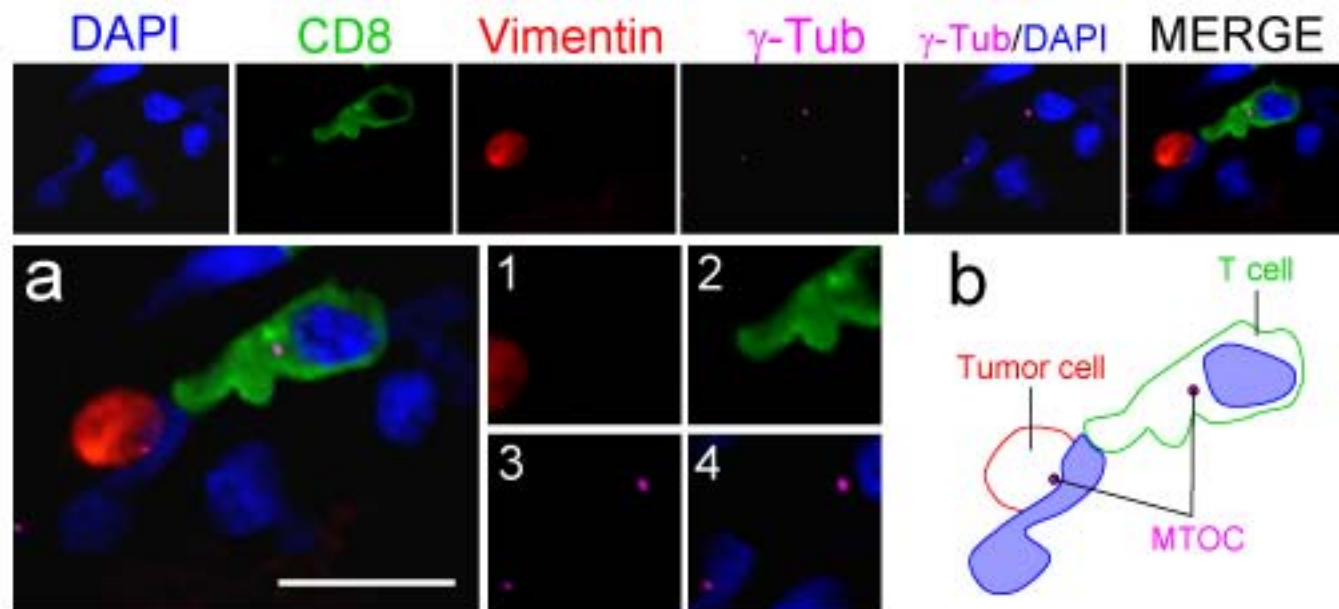

Supplementary Figure 6

Supplement: ajpath.2009.081034_6.pdf [file ajpath.2009.081034_6.pdf]
